# Supplementary material
Source: PubMed Central journal article supplement (PMC6985726)
Supplement: AAC.01825-19-s0001.pdf [file AAC.01825-19-s0001.pdf]

1 **New-Data Letter**

2 **Supplementary Data**

3 **Polymorphism existence of mobile tigecycline resistance gene *tet(X4)* in *Escherichia coli***

4 Huangwei Song<sup>1#</sup>, Dejun Liu<sup>1#</sup>, Ruichao Li<sup>2</sup>, Yulin Fu<sup>1</sup>, Weishuai Zhai<sup>1</sup>, Xiao Liu<sup>1</sup>, Tao He<sup>3</sup>,

5 Congming Wu<sup>1</sup>, Li Bai<sup>4</sup>, Yang Wang<sup>1\*</sup>

6 <sup>1</sup> Beijing Advanced Innovation Center for Food Nutrition and Human Health, College of  
7 Veterinary Medicine, China Agricultural University, Beijing, China.

8 <sup>2</sup> Jiangsu Co-Innovation Center for Prevention and Control of Important Animal Infectious  
9 Diseases and Zoonoses, College of Veterinary Medicine, Yangzhou University, Yangzhou,  
10 China.

11 <sup>3</sup> Key Laboratory for Control Technology and Standard for Agro-product Safety and Quality,  
12 Ministry of Agriculture and Rural Affairs, Jiangsu Key Laboratory for Food Quality and  
13 Safety—State Key Laboratory Cultivation Base of Ministry of Science and Technology,  
14 Institute of Food Safety and Nutrition, Jiangsu Academy of Agricultural Sciences, Nanjing,  
15 China.

16 <sup>4</sup> Key Laboratory of Food Safety Risk Assessment, National Health Commission of the  
17 People's Republic of China, China National Center for Food Safety Risk Assessment, Beijing,  
18 China.

19 # These authors contributed equally to this work: Huangwei Song and Dejun Liu.

20 \*Correspondence author: Tel: +86-10-62734255; E-mail: wangyang@cau.edu.cn

21 **Running title: The polymorphism existence of *tet(X4)* gene in *E. coli* 16EC**

22 **Key words:** tigecycline resistance; *tet(X4)* gene; MinION sequencing

**Supplementary Table S1.** Antimicrobial susceptibility profiles of *tet(X4)*-containing *E. coli* strain 16EC.

| Strains | Description                    | MIC (mg/L) of antimicrobials |      |     |      |      |     |      |      |       |     |       |      |      |
|---------|--------------------------------|------------------------------|------|-----|------|------|-----|------|------|-------|-----|-------|------|------|
|         |                                | TGC                          | MIN  | DOX | TET  | OTC  | CTE | FEP  | FFC  | MEM   | CST | CAZ   | CIP  | KAN  |
| 16EC    | <i>tet(X4)</i> carrying strain | 32                           | >128 | 64  | >128 | >128 | 128 | 0.03 | >128 | 0.015 | 1   | 0.125 | 0.25 | <0.5 |

Note: TGC, tigecycline; MIN, minocycline; DOX, doxycycline; TET, tetracycline; OTC, oxytetracycline; CTE, chlorotetracycline; FEP, cefepime; FFC, florfenicol; MEM, meropenem; CST, colistin; CAZ, ceftazidime; CIP, ciprofloxacin; KAN, kanamycin.

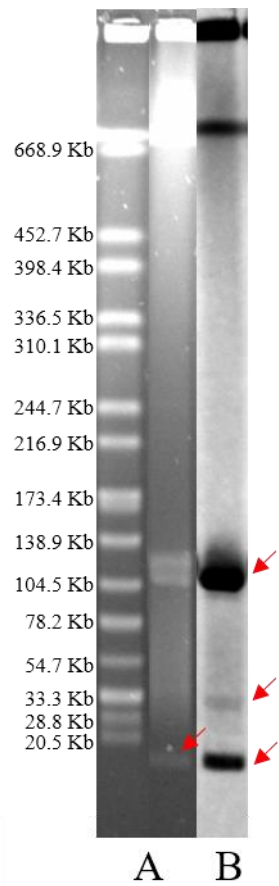

**Supplementary Figure S1.** Identification of *tet(X4)* in the original *E. coli* strain 16EC. (A) Plasmid size determination by S1 nuclease-PFGE.

(B) Southern blotting hybridization with a *tet(X4)*-specific probe. *Salmonella* H9812 served as the DNA marker.

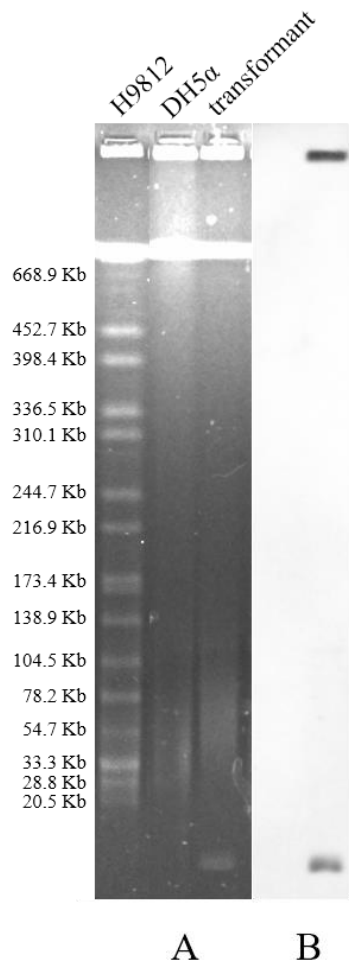

**Supplementary Figure S2.** Identification of *tet(X4)* in DH5 $\alpha$  and the transformant. (A) Plasmid size determination by S1 nuclease-PFGE. (B) Southern blotting hybridization with a *tet(X4)*-specific probe. *Salmonella* H9812 served as the DNA marker.
